# Supplementary material
Source: PubMed Central journal article supplement (PMC9453664)
Supplement: brc-0017-0349-s01.pdf [file brc-0017-0349-s01.pdf]

**Supplementary Table 1** Distribution of third primary cancers<sup>a</sup> among second primary cancers<sup>b</sup> in female breast first primary cancer patients

|                               |                                             | THIRD PRIMARY CANCERS |                                      |        |                       |               |                                    |                                              | Others | Total |
|-------------------------------|---------------------------------------------|-----------------------|--------------------------------------|--------|-----------------------|---------------|------------------------------------|----------------------------------------------|--------|-------|
|                               |                                             | Digestive organs      | Respiratory and Intrathoracic organs | Breast | Female genital organs | Urinary tract | Thyroid and other endocrine glands | Lymphoid, haematopoietic and related tissues |        |       |
| <b>SECOND PRIMARY CANCERS</b> | <b>N</b>                                    |                       |                                      |        |                       |               |                                    |                                              |        |       |
|                               | <b>Digestive organs</b>                     | 15                    | 1                                    | 3      | 7                     | 2             | 1                                  | 0                                            | 2      | 31    |
|                               | <b>Respiratory and Intrathoracic organs</b> | 3                     | 1                                    | 0      | 0                     | 1             | 0                                  | 1                                            | 0      | 6     |
|                               | <b>Breast</b>                               | 4                     | 3                                    | 0      | 2                     | 0             | 2                                  | 1                                            | 1      | 13    |
|                               | <b>Female genital organs</b>                | 0                     | 1                                    | 2      | 2                     | 0             | 1                                  | 2                                            | 1      | 9     |
|                               | <b>Others</b>                               | 1                     | 1                                    | 1      | 0                     | 2             | 2                                  | 1                                            | 0      | 8     |
|                               | <b>Total</b>                                | 23                    | 7                                    | 6      | 11                    | 5             | 6                                  | 5                                            | 4      | 67    |

<sup>a</sup> Digestive organs (C15-C26: C16 = 8, C18 = 8, C20 = 4, C21 = 1, C25 = 2), Respiratory and intrathoracic organs (C30-C39: C34 = 7), Breast (C50 = 6), Female genital organs (C51-C58: C51 = 1, C53 = 2, C54 = 7, C55 = 1), Urinary tract (C64-C68: C64 = 5), Thyroid and other endocrine glands (C73-C75: C73 = 6), Lymphoid, haematopoietic and related tissues (C81-C96: C85 = 2, C90 = 1, C91 = 1, C92 = 1), and others: Lip, oral cavity and pharynx (C1-C14 = 1), Skin melanoma (C43 = 1), Mesothelial and soft tissue (C45-C49: C48 = 1), Ill-defined, secondary or unspecified sites (C76-C80 = 1) defined according to the International Statistical Classification of Diseases and Related Health Problems 10<sup>th</sup> Revision [13].

<sup>b</sup> Digestive organs (C15-C26: C15 = 1, C16 = 4, C17 = 1, C18 = 18, C20 = 4, C22 = 1, C23 = 1, C25 = 1), Respiratory and intrathoracic organs (C30-C39: C32 = 1, C34 = 5), Breast (C50 = 14), Female genital organs (C51-C58: C52 = 1, C53 = 1, C54 = 6, C56 = 1), others: Skin melanoma (C43 = 1), Urinary tract (C64-C68: C67 = 1), Eye (C69 = 1), brain and other parts of central nervous system (C70-C72; C71-C72 = 1), Lymphoid, haematopoietic and related tissue (C81-C96: C88 = 1, C92 = 1), Uncertain or unknown behaviour (D37-D48 = 1) defined according to the International Statistical Classification of Diseases and Related Health Problems 10<sup>th</sup> Revision [13].
